# Supplementary material for: Yolk–shelled cathode materials with extremely high electrochemical performances prepared by spray pyrolysis
Source: Royal Society of Chemistry journal article supplement (doi:10.1039/c3nr01675g), 2013-01-01
Supplement: c3nr01675g.pdf [file c3nr01675g.pdf]

## Supporting Information

### Yolk-shelled cathode materials with extremely high electrochemical performances prepared by spray pyrolysis

Seung Ho Choi, Young Jun Hong, and Yun Chan Kang\*

Department of Chemical Engineering, Konkuk University, 1 Hwayang-dong, Gwangjin-gu,  
Seoul 143-701, Korea

#### This file includes:

- TEM images of the yolk-shell  $\text{LiNi}_{0.5}\text{Mn}_{1.5}\text{O}_4$  powders prepared directly by spray pyrolysis process.
- TEM and FE-SEM images of the yolk-shell  $\text{LiNi}_{0.5}\text{Mn}_{1.5}\text{O}_4$  cathode materials post-treated at 700°C and 750°C.
- XRD patterns of the yolk-shell-structured  $\text{LiNi}_{0.5}\text{Mn}_{1.5}\text{O}_4$  powders post-treated at various temperatures.
- Cycle performances of the yolk-shell-structured  $\text{LiNi}_{0.5}\text{Mn}_{1.5}\text{O}_4$  powders post-treated at various temperatures at a constant charge/discharge rate of 10 C.
- Discharge curves at extremely high discharge rates related to Fig. 4b.
- Nyquist plots of the yolk-shell  $\text{LiNi}_{0.5}\text{Mn}_{1.5}\text{O}_4$  powders post-treated at 600, 700, and 750°C after first charging.
- FE-SEM images of single-crystalline  $\text{LiNi}_{0.5}\text{Mn}_{1.5}\text{O}_4$  nanoparticles prepared at 750°C. Cycle properties of the yolk-shell and single-crystalline  $\text{LiNi}_{0.5}\text{Mn}_{1.5}\text{O}_4$  nanoparticles prepared by flame spray pyrolysis.
- SEM and TEM images of the yolk-shell  $\text{LiNi}_{0.5}\text{Mn}_{1.5}\text{O}_4$  powders after 1000 cycles.

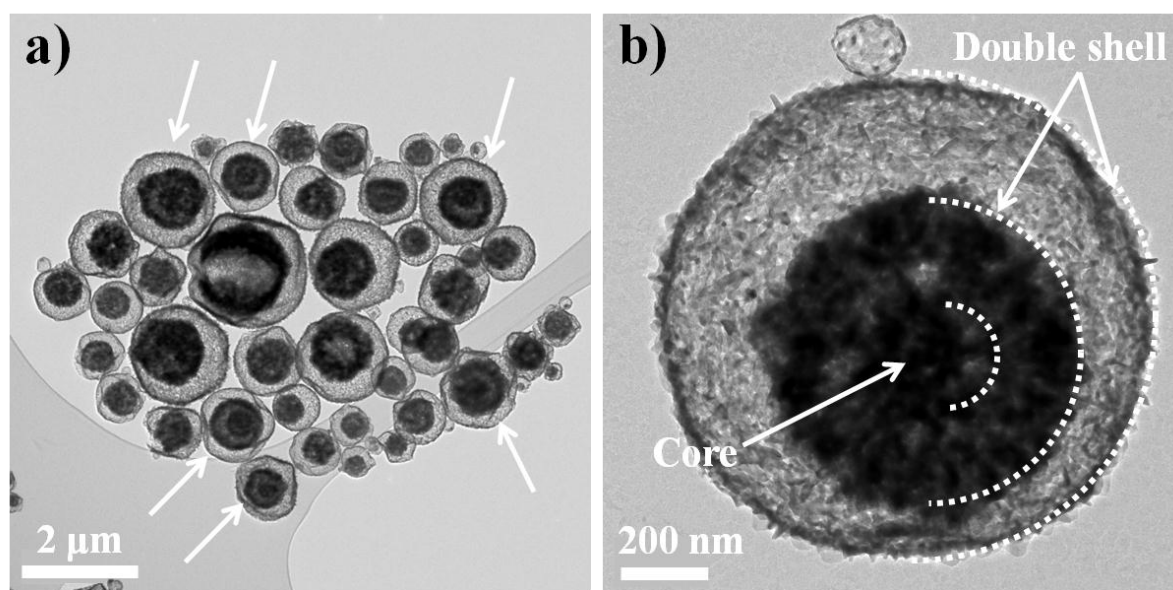

**Fig. S1** TEM images of the yolk-shell  $\text{LiNi}_{0.5}\text{Mn}_{1.5}\text{O}_4$  powders prepared directly by spray pyrolysis process.

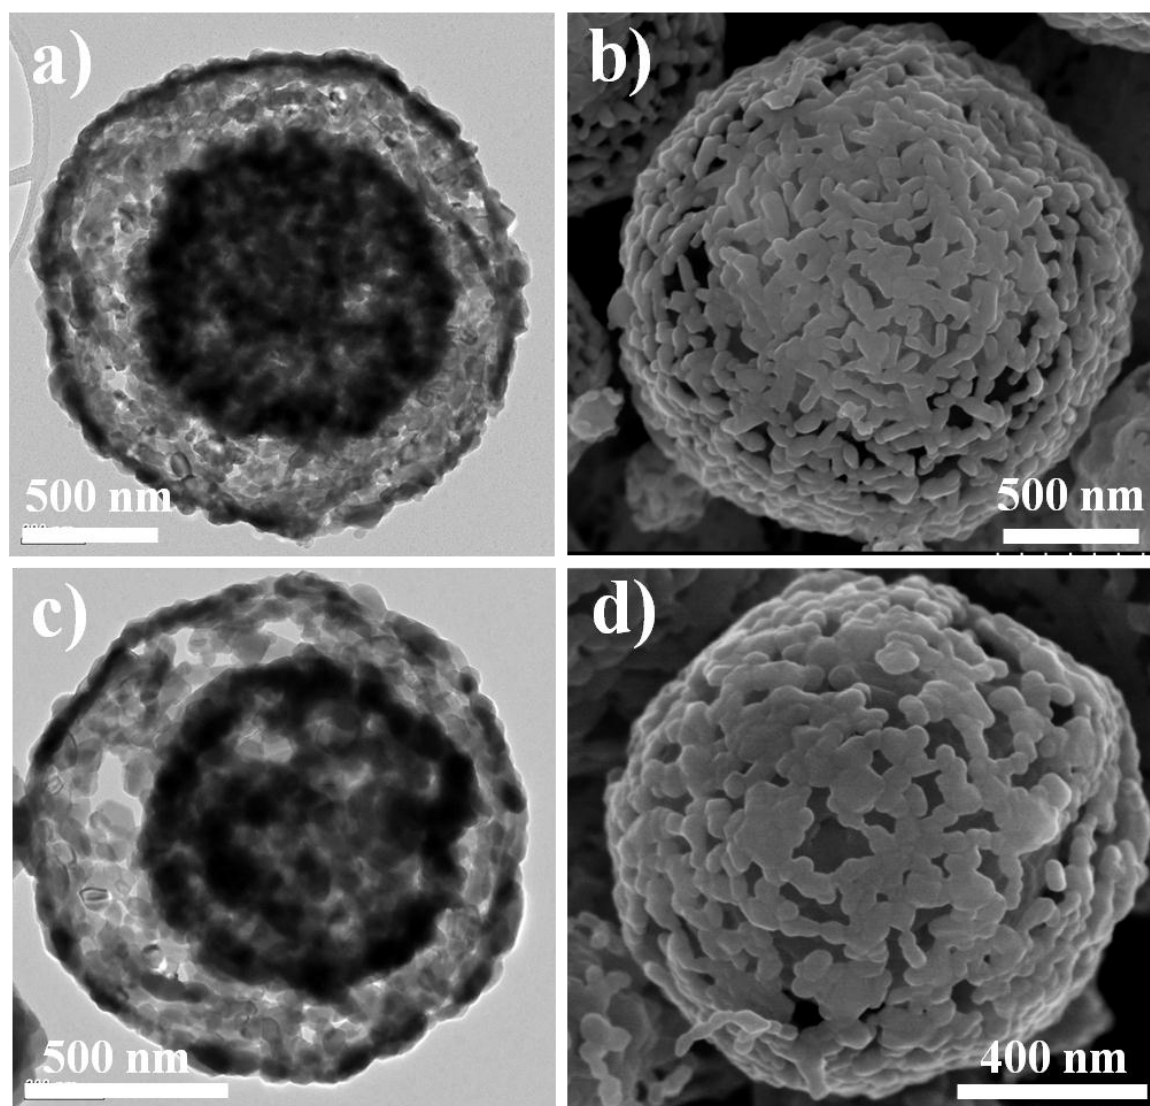

**Fig. S2** TEM and FE-SEM images of the yolk-shell  $\text{LiNi}_{0.5}\text{Mn}_{1.5}\text{O}_4$  cathode materials; (a,b) post-treated at  $700^\circ\text{C}$ , (c,d) post-treated at  $750^\circ\text{C}$ .

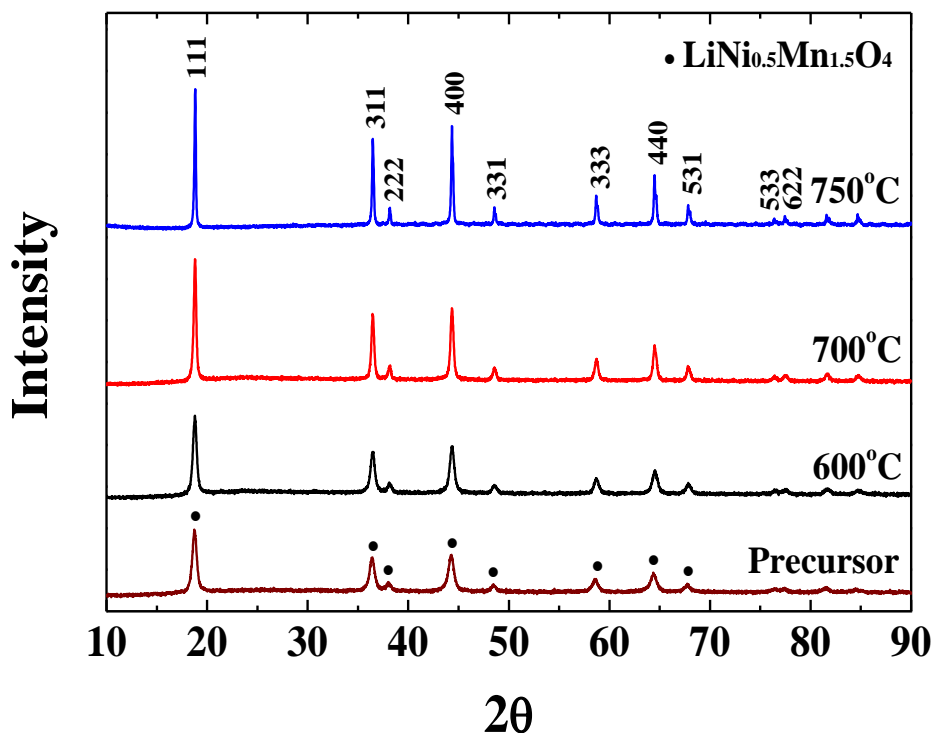

**Fig. S3** XRD patterns of the yolk-shell-structured  $\text{LiNi}_{0.5}\text{Mn}_{1.5}\text{O}_4$  powders post-treated at various temperatures.

The crystal structures of the yolk-shell  $\text{LiNi}_{0.5}\text{Mn}_{1.5}\text{O}_4$  powders obtained before and after post-treatment are shown in Fig S3. All patterns of the precursor and post-treated powders can be assigned to cubic spinel  $\text{LiNi}_{0.5}\text{Mn}_{1.5}\text{O}_4$  (JCPDS Card No.: 80-2162, space group:  $F3dm$ ,  $a = b = c = 8.170$ ). The mean crystallite sizes calculated using the Scherrer equation from the (111) peak widths of the precursor and post-treated powders at 600, 700, and 750°C are 16, 20, 30, and 50, respectively. A high degree of mixing of each component during drying and decomposition of droplets produced the phase pure  $\text{LiNi}_{0.5}\text{Mn}_{1.5}\text{O}_4$  yolk-shell powders even at a short residence time of 4 s of the powders inside the hot wall reactor.

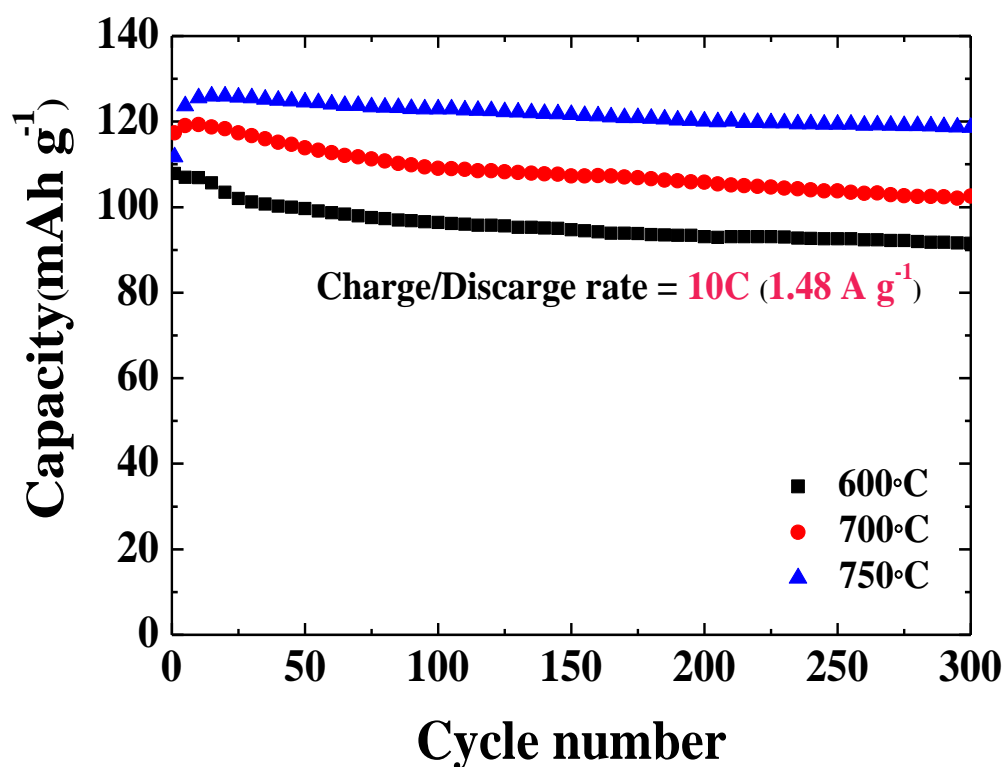

**Fig. S4** Cycle performances of the yolk-shell-structured  $\text{LiNi}_{0.5}\text{Mn}_{1.5}\text{O}_4$  powders post-treated at various temperatures at a constant charge/discharge rate of 10 C.

Fig. S4 shows the cycling performances of the yolk-shell  $\text{LiNi}_{0.5}\text{Mn}_{1.5}\text{O}_4$  powders post-treated at 600, 700, and 750°C. The initial discharge capacities of the yolk-shell  $\text{LiNi}_{0.5}\text{Mn}_{1.5}\text{O}_4$  powders post-treated at 600, 700, and 750°C were 108, 119, and 112  $\text{mAh g}^{-1}$ , respectively. The discharge capacities of the powders post-treated at 750°C increased slightly from 112 to 126  $\text{mA h g}^{-1}$  in the first ten cycles. The discharge capacity retentions of the  $\text{LiNi}_{0.5}\text{Mn}_{1.5}\text{O}_4$  powders post-treated at 600, 700, and 750°C powders were 85%, 86%, and 94%, respectively, after 300 cycles at a high constant current density of 10 C.

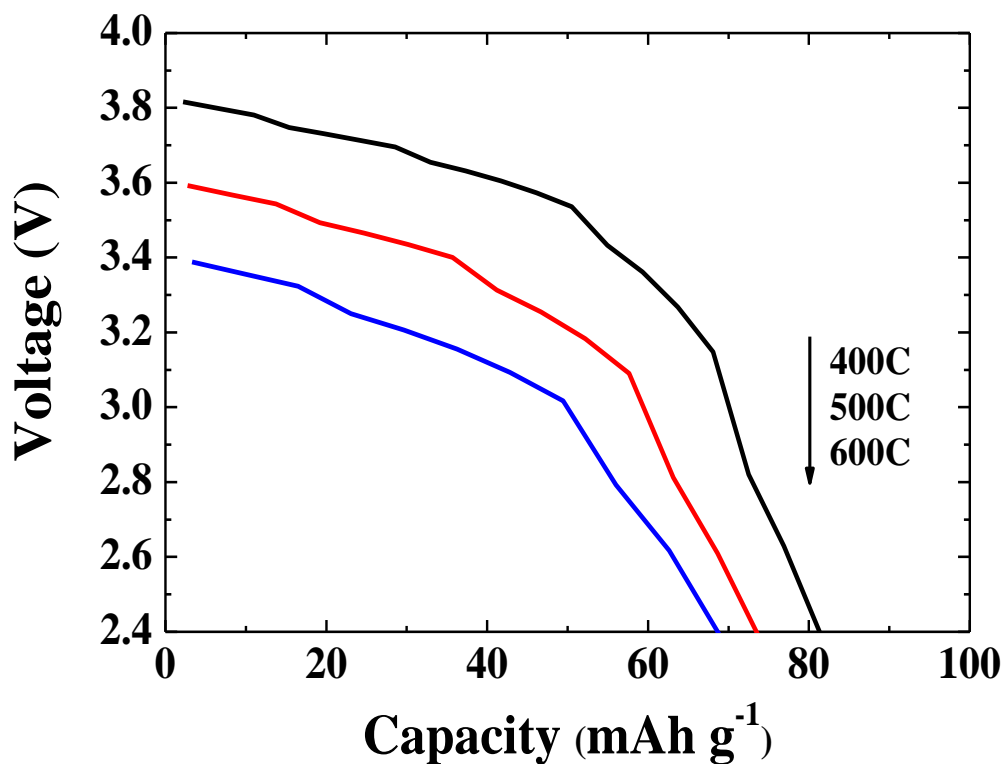

**Fig. S5** Discharge curves at extremely high discharge rates related to Figure 5b.

Fig. S5 shows the discharge curves of the yolk-shell LiNi<sub>0.5</sub>Mn<sub>1.5</sub>O<sub>4</sub> powders post-treated at 750°C. As the discharge rate increases from 400 to 500, and 600 C, the discharge capacity decreases from 86 to 74, and 69 mAh g<sup>-1</sup>, the corresponding energy densities are 291, 245, and 213 Wh kg<sup>-1</sup>.

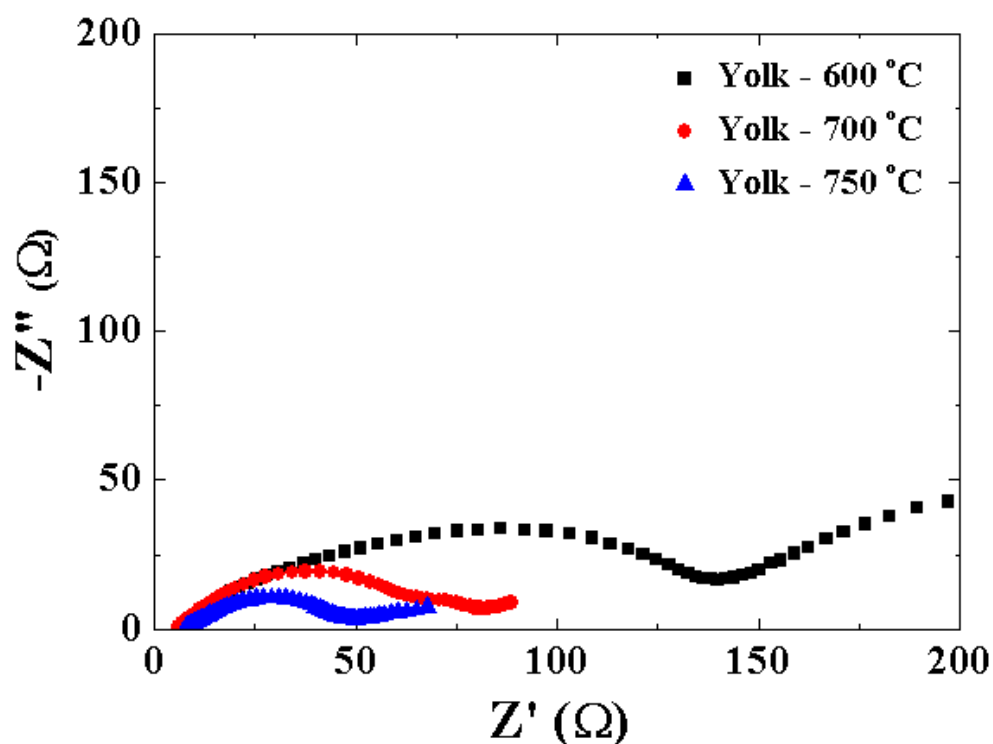

**Fig. S6** Nyquist plots of the yolk-shell  $\text{LiNi}_{0.5}\text{Mn}_{1.5}\text{O}_4$  powders post-treated at 600, 700, and 750 °C after first charging.

Fig. S6 shows the electrochemical impedance spectroscopy of the  $\text{LiNi}_{0.5}\text{Mn}_{1.5}\text{O}_4$  yolk-shell powders post-treated at various temperatures. The medium-frequency semicircle was assigned to the charge-transfer resistance ( $R_{ct}$ ) at the interface between the electrode material and the electrolyte. The charge-transfer resistances of the yolk-shell  $\text{LiNi}_{0.5}\text{Mn}_{1.5}\text{O}_4$  powders post-treated at 600, 700, and 750 °C were 155, 71, and 42  $\Omega$ , respectively. The yolk-shell  $\text{LiNi}_{0.5}\text{Mn}_{1.5}\text{O}_4$  powders with high crystallinity and phase homogeneity had the lowest charge-transfer resistance.

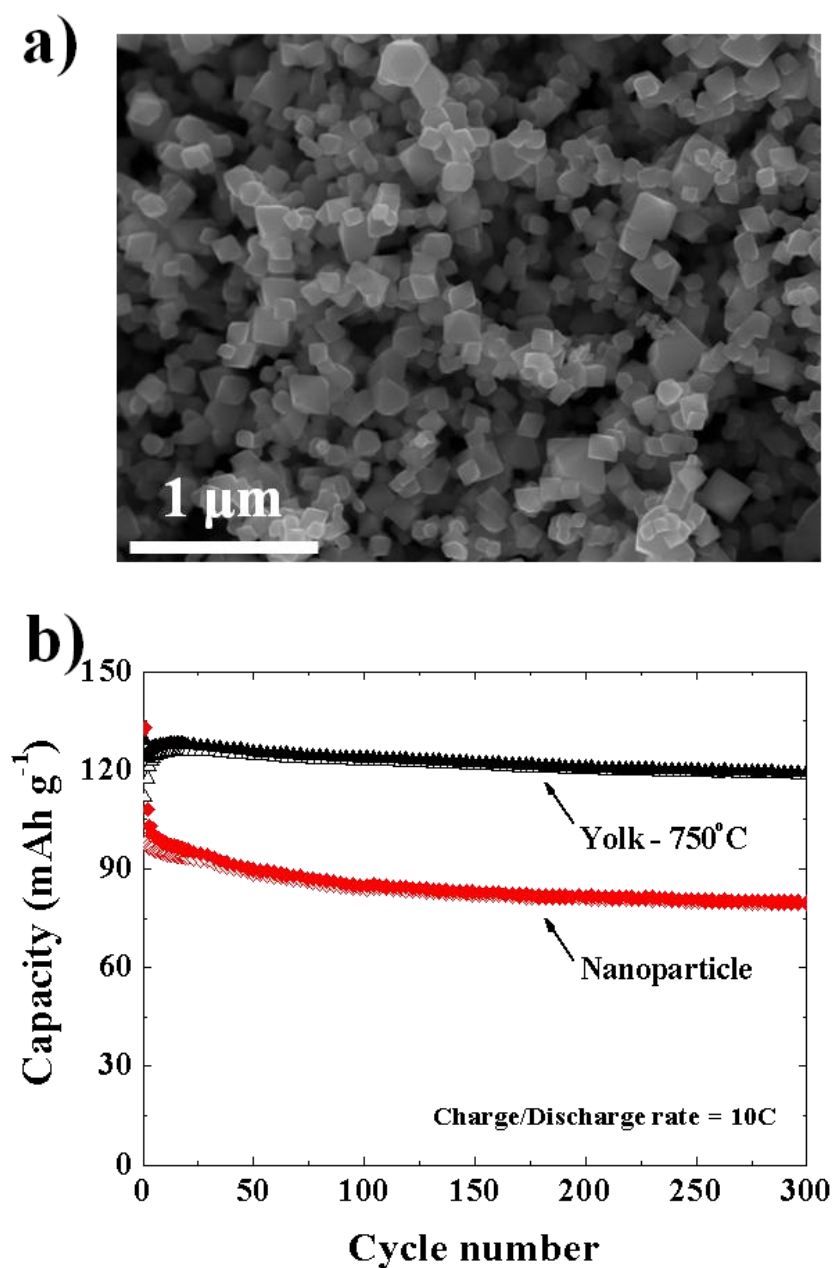

**Fig. S7** (a) FE-SEM images of single-crystalline  $\text{LiNi}_{0.5}\text{Mn}_{1.5}\text{O}_4$  nanoparticles prepared at  $750^\circ\text{C}$ . (b) Cycle properties of the yolk-shell and single-crystalline  $\text{LiNi}_{0.5}\text{Mn}_{1.5}\text{O}_4$  nanoparticles prepared by flame spray pyrolysis.

The cycling performances of the yolk-shell  $\text{LiNi}_{0.5}\text{Mn}_{1.5}\text{O}_4$  powders post-treated at  $750^\circ\text{C}$  were compared to those of the  $\text{LiNi}_{0.5}\text{Mn}_{1.5}\text{O}_4$  nanopowders prepared by flame spray pyrolysis at a high current density of 10 C. Fig. S7a shows the SEM image of the  $\text{LiNi}_{0.5}\text{Mn}_{1.5}\text{O}_4$  nanopowders prepared by flame spray pyrolysis. The precursor powders



directly prepared by flame spray pyrolysis were post-treated at 750°C. The detail procedure of the flame spray pyrolysis was described in our previous report [*Int. J. Electrochem. Sci.*, 2013, 8, 1146]. The  $\text{LiNi}_{0.5}\text{Mn}_{1.5}\text{O}_4$  nanopowders had the mean size of 80 nm. The  $\text{LiNi}_{0.5}\text{Mn}_{1.5}\text{O}_4$  nanopowders had the discharge capacities of 98 and 79  $\text{mA h g}^{-1}$  for the 1<sup>st</sup> and 300<sup>th</sup> cycles. However, the yolk-shell  $\text{LiNi}_{0.5}\text{Mn}_{1.5}\text{O}_4$  powders delivered a high discharge capacity of 119  $\text{mA h g}^{-1}$  after 300 cycles. The yolk-shell  $\text{LiNi}_{0.5}\text{Mn}_{1.5}\text{O}_4$  powders had better cycling performance compared to that of the nanopowders at a high current density.

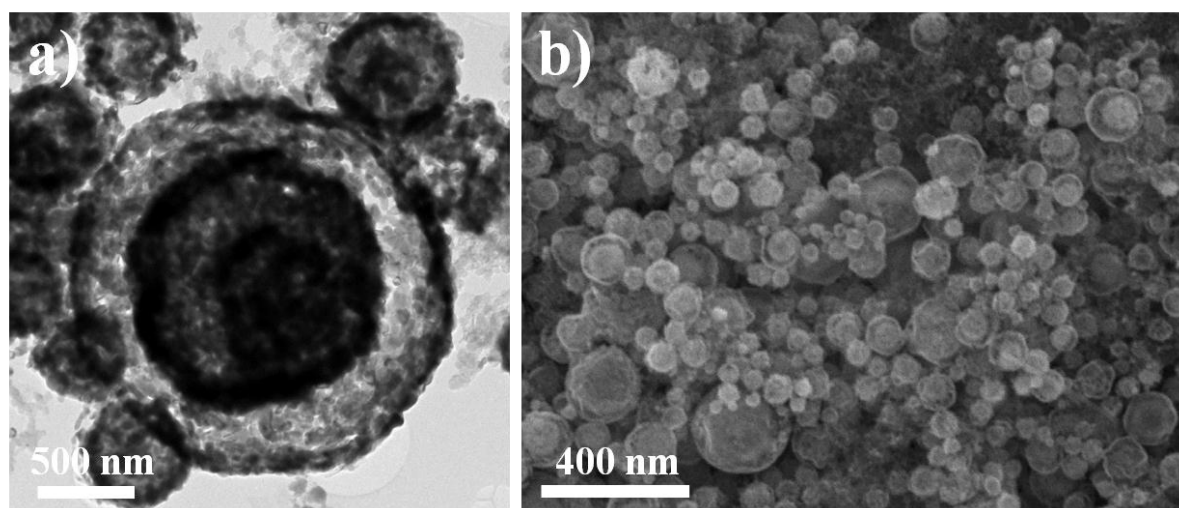

**Fig. S8** SEM and TEM images of the yolk-shell  $\text{LiNi}_{0.5}\text{Mn}_{1.5}\text{O}_4$  powders after 1000 cycles.

Fig. S8 shows the morphologies of the yolk-shell  $\text{LiNi}_{0.5}\text{Mn}_{1.5}\text{O}_4$  powders after 1000 cycles. SEM and TEM images showed that the yolk-shell  $\text{LiNi}_{0.5}\text{Mn}_{1.5}\text{O}_4$  powders maintained their overall morphology after 1000 cycles.
